# Supplementary material for: Institutional “Paris Agreement Compatible” Mitigation Scenarios Evaluated Against the Paris Agreement 1.5°C Goal
Source: Research Square preprint supplement (doi:10.21203/rs.3.rs-599934/v1), 2021-06-21
Supplement: Supplementary file 1 [file ff01c38b3cabc5734ff3aad9.docx]

## Supplementary Information: Institutional “Paris Agreement Compatible” Mitigation Scenarios Evaluated Against the Paris Agreement 1.5°C Goal

Robert J. Brecha1,2,*, Gaurav Ganti1, Robin D. Lamboll3, Zebedee Nicholls4,5,6, Bill Hare1, Jared Lewis5,6, Malte Meinshausen4,5,6, Michiel Schaeffer1,7, Matthew J. Gidden1,8

1Climate Analytics, Berlin, Germany

2Hanley Sustainability Institute, Renewable and Clean Energy Program and Physics Dept., University of Dayton, Dayton, OH, USA

**3** Grantham Institute for Climate Change and the Environment, Imperial College London, UK

4 Australian-German Climate and Energy College, The University of Melbourne, Australia

5School of Geography, Earth an Atmospheric Sciences, The University of Melbourne, Australia

6 Climate Resource, Melbourne, Australia

7The Global Center on Adaptation, the Netherlands

8International Institute for Applied Systems Analysis, Laxenburg, Austria

*Corresponding author: [robert.brecha@climateanalytics.org](mailto:robert.brecha@climateanalytics.org)

Table of Contents

[Supplementary Information: Institutional “Paris Agreement Compatible” Mitigation Scenarios Evaluated Against the Paris Agreement 1.5°C Goal 1](#_Toc72859586)

[1. Evaluating the Constant Quantile Extension (CQE) method 2](#_Toc72859587)

[2. Evaluating uncertainty due to the infilling method 3](#_Toc72859588)

[3. Climate assessment – key characteristics of the pathways 4](#_Toc72859589)

[References 5](#_Toc72859590)

### Evaluating the Constant Quantile Extension (CQE) method

As described in the *Methods* section of the main text we truncate each pathway (i.e., model and scenario combination) at 2050 and then use the CQE method to extend them till 2100 and calculate the error as:

where is the error, *pi,t* is the CQE-extended value of pathway *i* at time *t*, *qi,t* is the originally projected value at that time, is the number of pathways (times) being summed over and is the standard deviation of original projections at that time. *Table S1* shows the relative errors of using the CQE method on the SR1.5 database. It indicates that the errors are generally low - on average 0.23 (0.30 excluding the HFCs), compared to values above 0.5 when using any of the infilling techniques that infer one species from another19.

**Table S1**: a measure of the average root mean squared errors arising from reconstructing the data in the SR1.5 database after 2050 using the Constant Quantile Extension method, normalised by the standard deviation of the data at each future time, for each emission category.

| **Emission Species** | **Relative Error (** |
| --- | --- |
| BC | 0.35805 |
| CH4 | 0.177191 |
| CO2 | 0.21437 |
| CO2|AFOLU | 0.499959 |
| CO2|Energy and Industrial Processes | 0.224759 |
| CO | 0.518171 |
| HFC|HFC134a | 0.099771 |
| HFC|HFC143a | 0.083332 |
| HFC|HFC227ea | 0.009422 |
| HFC|HFC23 | 0.113181 |
| HFC|HFC32 | 0.158816 |
| HFC|HFC43-10 | 0.096444 |
| HFC|HFC125 | 0.083339 |
| N2O | 0.265455 |
| NH3 | 0.148526 |
| NOx | 0.325515 |
| OC | 0.476686 |
| SF6 | 0.118234 |
| Sulfur | 0.315327 |
| VOC | 0.372913 |

### Evaluating uncertainty due to the infilling method

**Table S2** Comparison of multi-gas emission pathways across different infilling methods

| **Variable** | **Infill**  **Type** | **IEA**  **NZE** | | **IEA**  **SDS 2020** | | **BP**  **Net Zero** | | **Shell**  **Sky 1.5** | | **Equinor**  **Rebalance** | |
| --- | --- | --- | --- | --- | --- | --- | --- | --- | --- | --- | --- |
|  | **2030** | **2050** | **2030** | **2050** | **2030** | **2050** | **2030** | **2050** | **2030** | **2050** |
| **Energy and Industrial Process CO2**  **(Mt CO2 / yr)** | **EQW** | **21283** | **0** | **26824** | **10219** | **28516** | **3685** | **36239** | **19867** | **28853** | **12454** |
| **RMS** | **21283** | **0** | **26824** | **10219** | **28516** | **3685** | **36239** | **19867** | **28853** | **12454** |
| **QRW** | **21283** | **0** | **26824** | **10219** | **28516** | **3685** | **36239** | **19867** | **28853** | **12454** |
| **AFOLU CO2**  **(Mt CO2 / yr)** | **EQW** | **-1196** | **-7698** | **59** | **-2022** | **309** | **-3897** | **891** | **-5214** | **310** | **-1469** |
| **RMS** | **2261** | **1857** | **381** | **-2024** | **-103** | **-4766** | **891** | **-5214** | **1809** | **-1201** |
| **QRW** | **19** | **-1272** | **422** | **-1841** | **537** | **-1498** | **891** | **-5214** | **560** | **-1640** |
| **CH4**  **(Mt CH4 / yr)** | **EQW** | **217** | **112** | **261** | **190** | **275** | **146** | **426** | **281** | **276** | **206** |
| **RMS** | **255** | **190** | **259** | **210** | **283** | **214** | **426** | **281** | **234** | **177** |
| **QRW** | **248** | **193** | **273** | **199** | **284** | **195** | **426** | **281** | **286** | **203** |
| **N2O**  **(kt N2O / yr)** | **EQW** | **7329** | **5490** | **9250** | **7948** | **9657** | **6596** | **12573** | **11813** | **9657** | **8596** |
| **RMS** | **9042** | **9404** | **9460** | **8830** | **9939** | **9149** | **12573** | **11813** | **6841** | **7707** |
| **QRW** | **8974** | **8287** | **9674** | **8214** | **9877** | **8175** | **12573** | **11813** | **9917** | **8376** |

There is strong uncertainty in the infilled gases for the Equinor Rebalance and IEA NZE scenarios, depending on the method selected to derive the relationship between the lead gas (CO2 emissions from energy and industrial processes) and the infilled gases. In this section, we evaluate the uncertainty for the CH4 and N2O emissions (as an example).


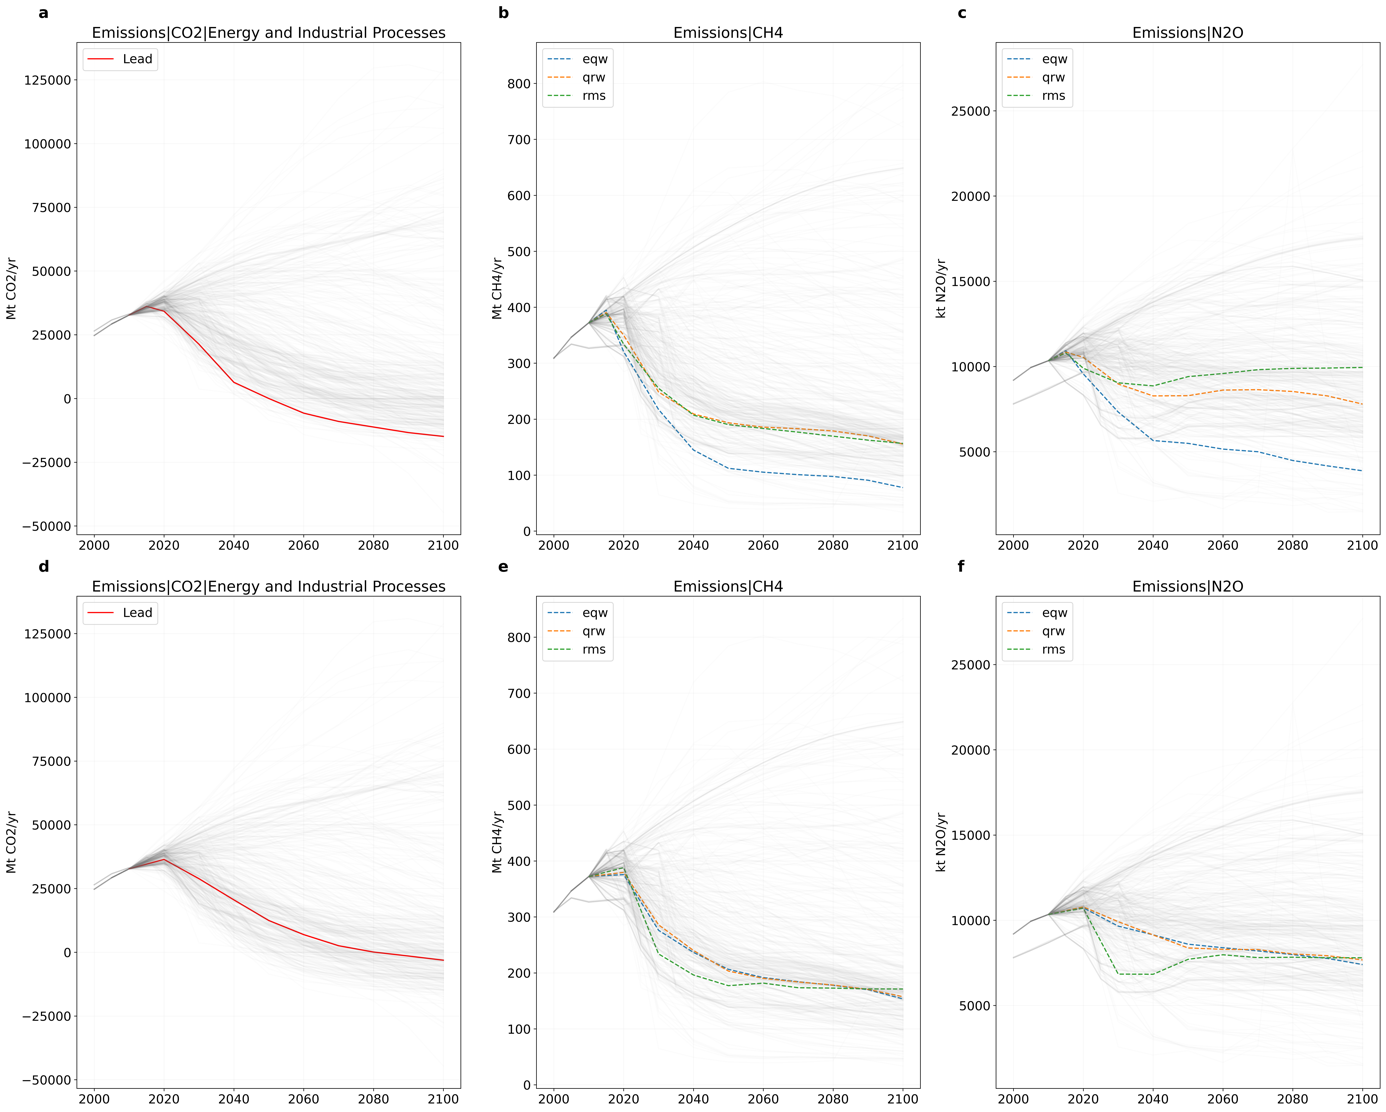


**Figure S1**: Effect of the infilling method for a given lead gas for (a – c) IEA NZE scenario and (d – f) Equinor Rebalance scenario

The RMS pathway selection method can lead to the infilling of relatively extreme emissions that are not necessarily driven by the lead gas. The IEA NZE scenario demonstrates this – while the lead gas emissions drop steeply, the pathway that is selected has relatively high N2O emissions (*rms* line in Figure S1b and c) that indicate a model-specific result. A similar effect is observed for the corresponding emissions for the Equinor Rebalance scenario. On the other hand, the EQW method’s inherent assumption of monotonicity can lead to large reductions in the infilled gas without a clear correlation to the lead gas reduction – we see this in the stringent CH4 reductions in the IEA NZE scenario in panel b (for more details see previously published discussion of the methods19). Hence as a default case for the main results, we select the Quantile Rolling Windows (QRW) approach to provide a balanced and consistent approach to infer the missing emissions.

### Climate assessment – key characteristics of the pathways

The categorisation of pathways on the basis of their climate impact follows the categorisation scheme adopted in SR1.563, where categories were constructed based on the probability of exceeding a given temperature target. The categories and their respective exceedance probabilities (P) are adapted from SR1.5 and presented in the table below:

**Table S3** SR1.5 climate categories for pathways

| **Pathway category** | **Criteria for assignment** |
| --- | --- |
| Below 1.5°C | P1.5°C <= 0.50 |
| 1.5°C low overshoot | 0.50 < P1.5°C <= 0.67 and P1.5°C (2100) <= 0.50 |
| 1.5°C high overshoot | 0.67 < P1.5°C and P1.5°C (2100) <= 0.50 |
| Lower 2°C | P2.0°C <= 0.34 (excluding above) |
| Higher 2°C | 0.34 < P2.0°C <= 0.50 |
| Above 2°C | P2.0°C > 0.50 |

We present the variation of the climate categorization across the different infilling methods assessed in this study. In only one case is there a change in categorization due to infilling method because the scenario results lie near the boundary between two categories.

**Table S4** Categorisation across different infilling methods

| **Scenario/IF method** | **QRW** | **RMS** | **EQW** |
| --- | --- | --- | --- |
| **IEA (NZE)** | 1.5C low overshoot | 1.5C high overshoot | 1.5C low overshoot |
| **BP (Net Zero)** | 1.5C high overshoot | 1.5C high overshoot | 1.5C high overshoot |
| **BP (Rapid)** | Lower 2C | Lower 2C | Lower 2C |
| **Equinor (Rebalance)** | Lower 2C | Lower 2C | Lower 2C |
| **IEA (SDS)** | Lower 2C | Lower 2C | Lower 2C |
| **Shell (Sky)** | Lower 2C | Lower 2C | Lower 2C |

### Mitigation lever results

**Table S5** Comparison of mitigation levers

| **Mitigation**  **Lever** | **Pathway** | **Source** | **Level compared to 2010 (%)**  **Median**  **(Interquartile Range)** | |
| --- | --- | --- | --- | --- |
| **2030** | **2050** |
| **Et** | **Below 1.5C [7]** | **SR15** | **84 (96, 82)** | **89 (112, 85)** |
| **1.5C low overshoot [43]** | **SR15** | **103 (109, 92)** | **112 (122, 95)** |
| **1.5C high overshoot [35]** | **SR15** | **125 (129, 118)** | **138 (147, 120)** |
| **Lower 2C [74]** | **SR15** | **113 (126, 103)** | **127 (138, 112)** |
| **Higher 2C [58]** | **SR15** | **124 (133, 112)** | **144 (151, 122)** |
| **Above 2C [188]** | **SR15** | **134 (143, 127)** | **160 (178, 148)** |
| **Rebalance** | **equinor** | **113** | **98** |
| **Sky** | **shell** | **124** | **149** |
| **SDS** | **IEA** | **109** |  |
| **NZE2050** | **IEA** | **106** | **93** |
| **CIt** | **Below 1.5C [7]** | **SR15** | **47 (50, 42)** | **4 (10, 3)** |
| **1.5C low overshoot [43]** | **SR15** | **62 (72, 57)** | **11 (18, -0)** |
| **1.5C high overshoot [35]** | **SR15** | **73 (82, 66)** | **9 (22, 3)** |
| **Lower 2C [74]** | **SR15** | **71 (81, 61)** | **29 (34, 23)** |
| **Higher 2C [58]** | **SR15** | **80 (82, 74)** | **38 (45, 28)** |
| **Above 2C [188]** | **SR15** | **94 (103, 88)** | **84 (98, 61)** |
| **Rebalance** | **Equinor** | **79** | **40** |
| **Sky 1.5** | **Shell** | **89** | **40** |
| **SDS** | **IEA** | **76** |  |
| **NZE** | **IEA** | **62** | **0** |

### References

1. Lamboll, R. D., Nicholls, Z. R. J., Kikstra, J. S., Meinshausen, M. & Rogelj, J. Silicone v1.0.0: An open-source Python package for inferring missing emissions data for climate change research. *Geosci. Model Dev.* **13**, 5259–5275 (2020).

2. Rogelj, J. *et al.* Chapter 2: Mitigation Pathways Compatible with 1.5°C in the Context of Sustainable Development. in *Global Warming of 1.5°C. An IPCC Special Report on the impacts of global warming of 1.5°C above pre-industrial levels and related global greenhouse gas emission pathways, in the context of strengthening the global response to the threat of climate change* (eds. Masson-Delmotte, V. et al.) (IPCC, 2018).
